# Supplementary material for: Towards highly active and stable nickel-based metal–organic frameworks as ethylene oligomerization catalysts
Source: Royal Society of Chemistry journal article supplement (doi:10.1039/c8dt03866j), 2019-01-01
Supplement: c8dt03866j1.pdf [file c8dt03866j1.pdf]

Supporting Information

**Towards highly active and stable Nickel-based Metal-Organic Frameworks as  
Ethylene Oligomerization Catalysts**

Ubed SF. Arrozi<sup>a</sup>, Volodymyr Bon<sup>a</sup>, Christel Kutzscher<sup>a</sup>, Irena Senkowska<sup>a</sup>, Stefan Kaskel<sup>a</sup>

Technische Universität Dresden, Department of Chemistry, Institute of Inorganic Chemistry,  
Bergstraße 66, D-01062 Dresden, Germany

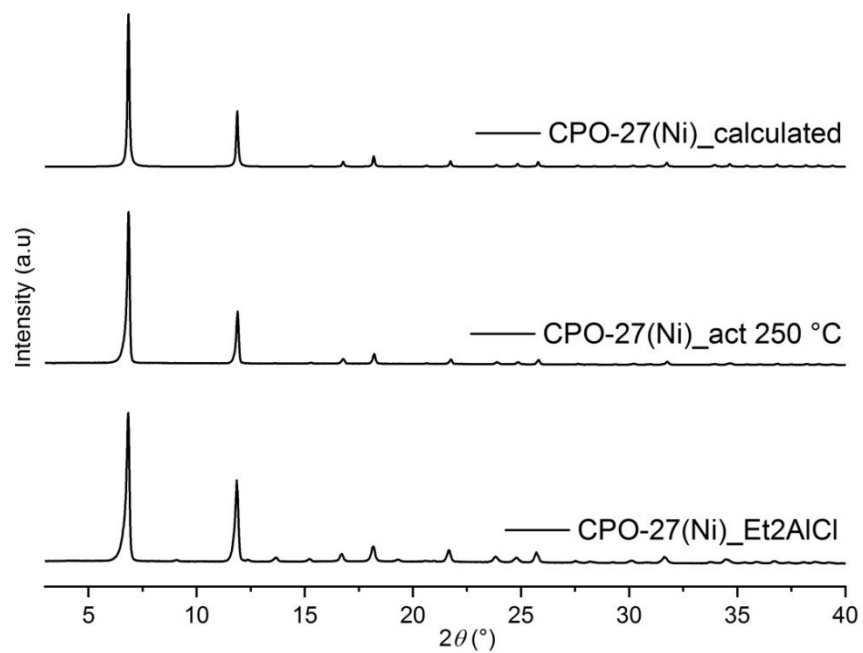

Figure S1. PXRD patterns of CPO-27(Ni) (**1**): theoretical pattern calculated from the crystal structure, [CCDC 288477] (top); after desolvation at 250 °C in vacuum (middle), after stirring in toluene in the presence of the  $\text{Et}_2\text{AlCl}$  overnight (bottom).

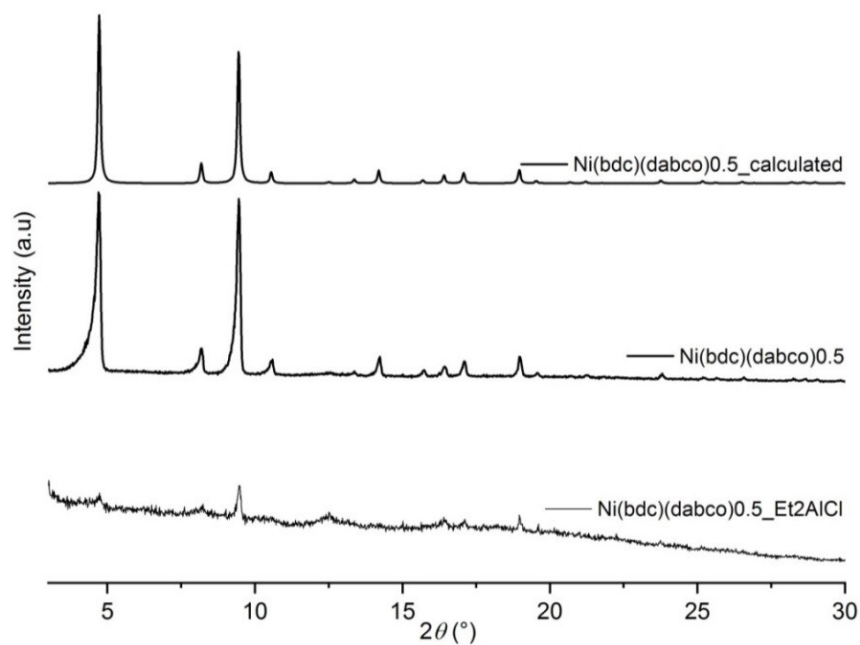

Figure S2. PXRD patterns of  $[\text{Ni}(\text{bdc})(\text{dabco})_{0.5}]_n$  (**4**): theoretical pattern calculated from the crystal structure, CCDC 802893 (top); activated  $[\text{Ni}(\text{bdc})(\text{dabco})_{0.5}]_n$  (middle), after stirring in toluene in the presence of the  $\text{Et}_2\text{AlCl}$  overnight (bottom).

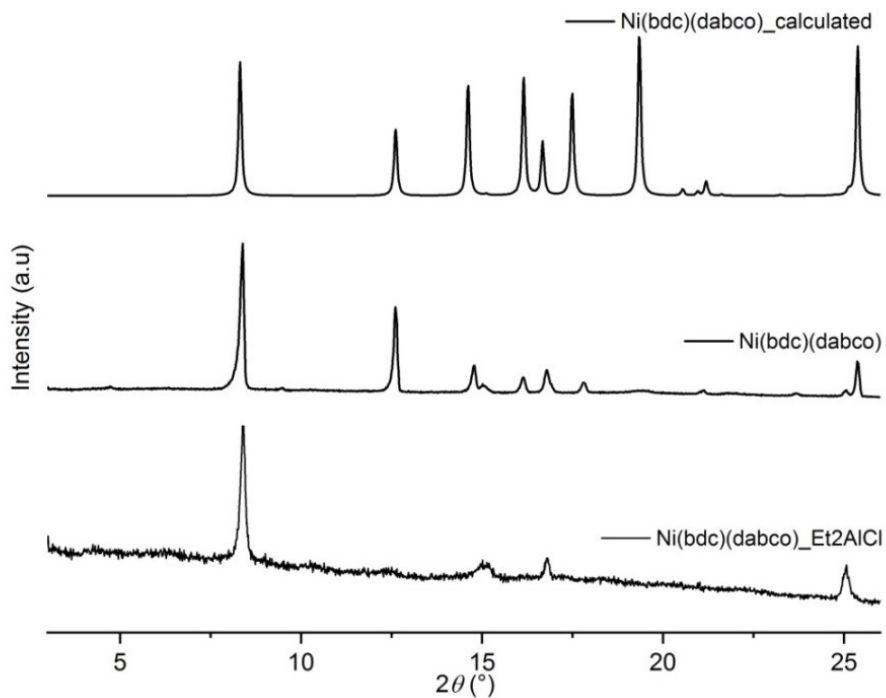

Figure S3. PXRD patterns of  $[\text{Ni}(\text{bdc})(\text{dabco})]_n$  (**2**): theoretical pattern calculated from the crystal structure (top) [CCDC 802894]; activated (middle), after stirring in toluene in the presence of the  $\text{Et}_2\text{AlCl}$  overnight (bottom).

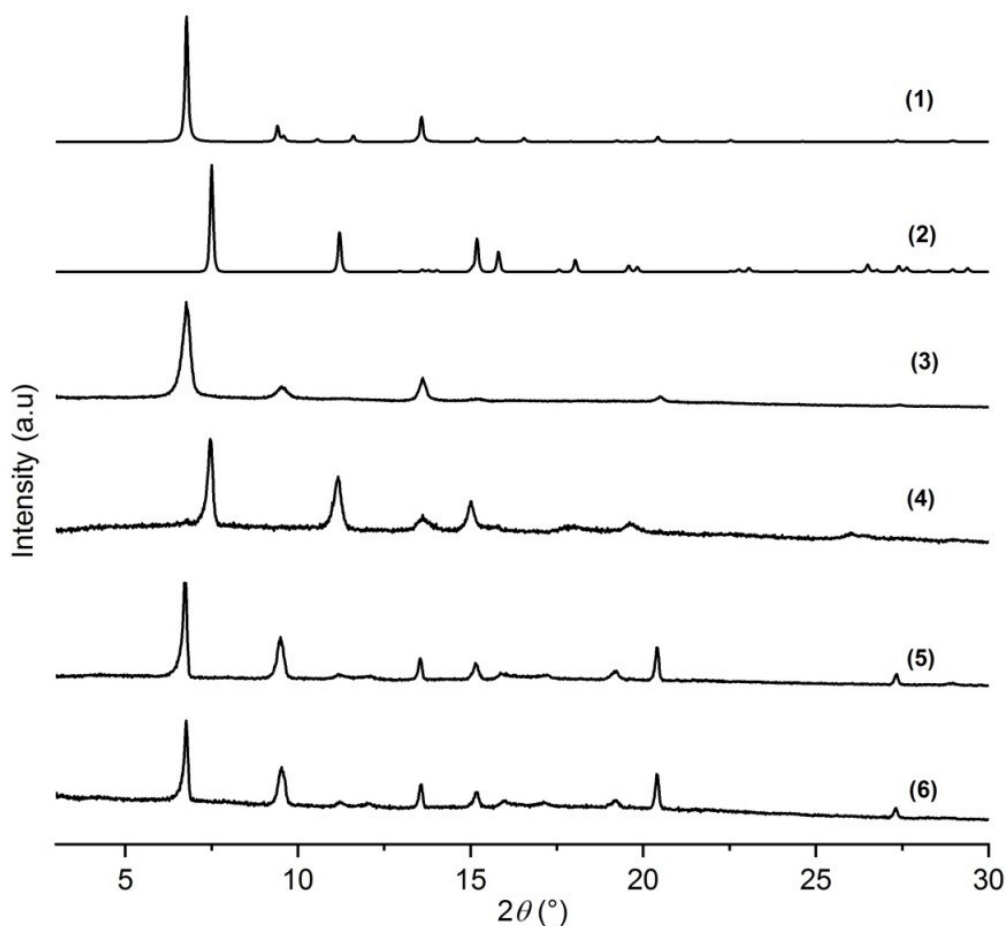

Figure S4. PXRD patterns of  $[\text{Ni}(\text{ndc})(\text{dabco})_{0.5}]_n$  (DUT-8(Ni)) (**5/6**): theoretical pattern of the open pore form of DUT-8(Ni) calculated from the crystal structure [CCDC 760964] (1); theoretical pattern of the closed pore form DUT-8(Ni) calculated from the crystal structure [CCDC 1034317] (2); activated DUT-8(Ni)<sub>rigid</sub> (3); activated DUT-8(Ni)<sub>flexible</sub> (4); DUT-8(Ni)<sub>flexible</sub> compound stirred in toluene (showing the opening of the pores) (5); and DUT-8(Ni)<sub>rigid</sub> after stirring in toluene in the presence of the  $\text{Et}_2\text{AlCl}$  overnight (6).

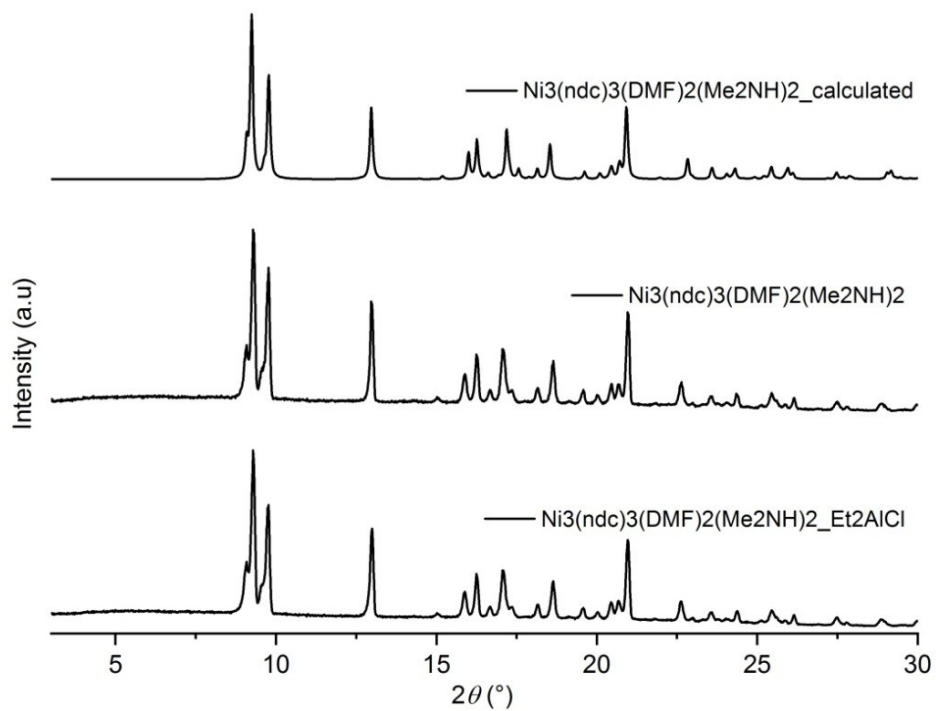

Figure S5. PXRD patterns of  $[\text{Ni}_3(\text{ndc})_3(\text{DMF})_2((\text{CH}_3)_2\text{NH})_2]_n$  (**3**): theoretical pattern calculated from the crystal structure [CCDC 759306] (top); activated (middle), after stirring in toluene in the presence of the  $\text{Et}_2\text{AlCl}$  overnight (bottom).

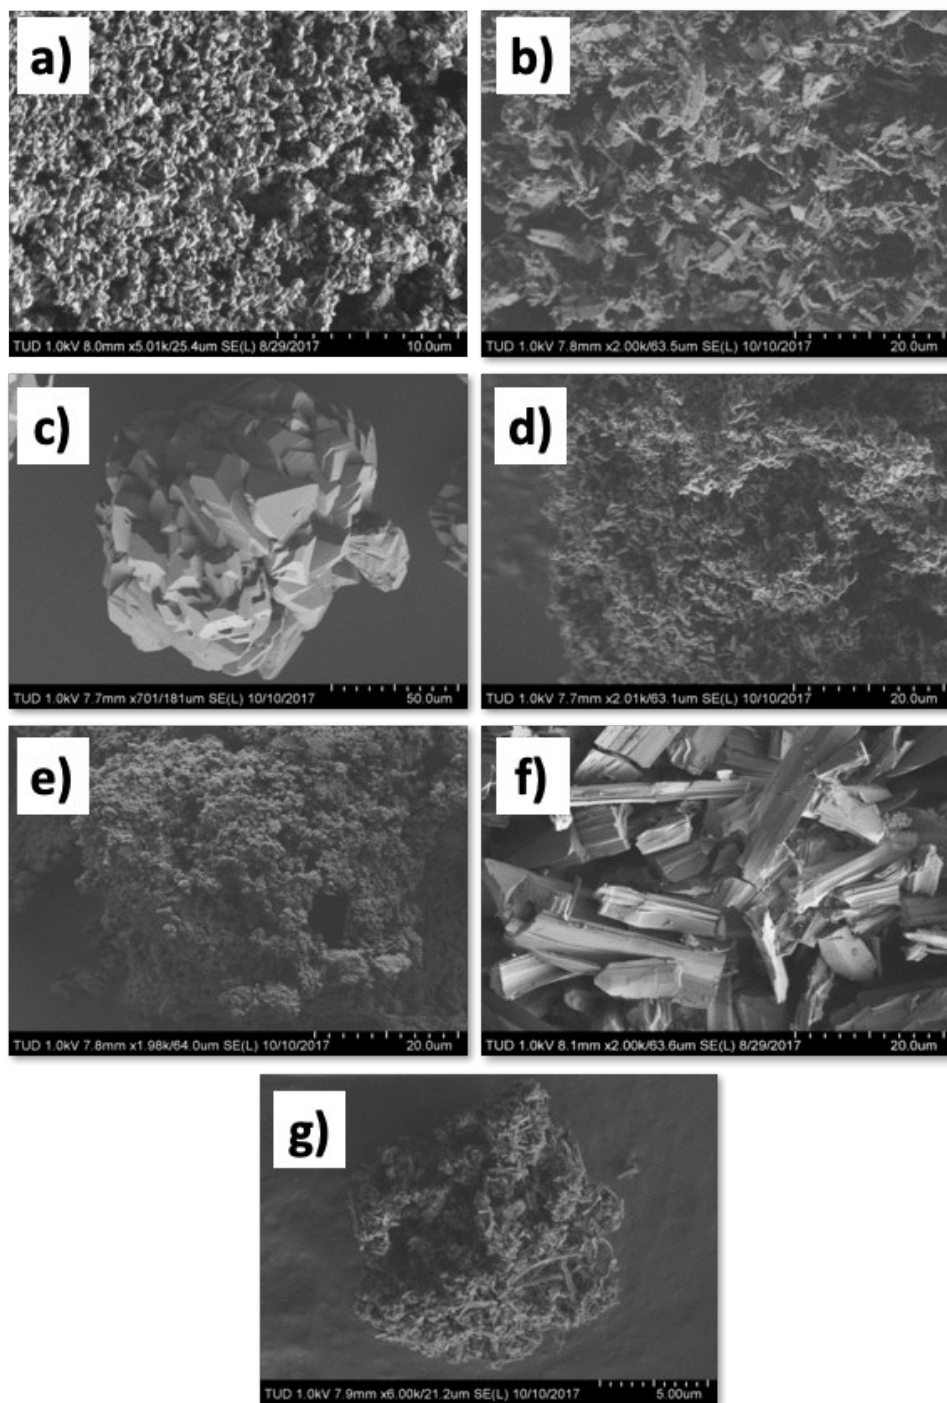

Figure S6. SEM images of: a) CPO-27(Ni) (**1**), b)  $[\text{Ni}(\text{bdc})(\text{dabco})]_n$  (**2**), c)  $[\text{Ni}_3(\text{ndc})_3(\text{DMF})_2((\text{CH}_3)_2\text{NH})_2]_n$  (**3**), d)  $[\text{Ni}(\text{bdc})(\text{dabco})_{0.5}]_n$  (**4**); e) DUT-8(Ni)\_rigid (**5**), f) DUT-8(Ni)\_flexible (**6**), and g) DUT-128 (**7**). ImageJ software package was used to calculate crystal size distribution.

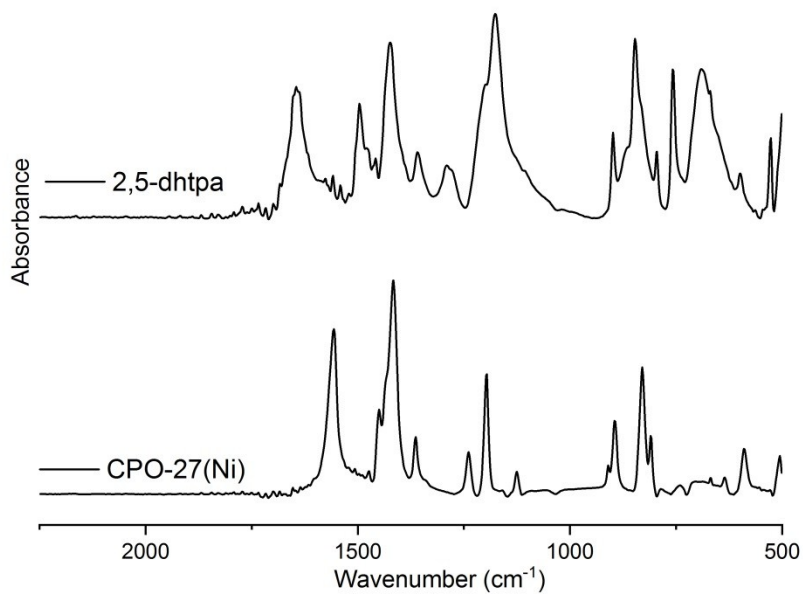

Figure S7. ATR-IR spectra of 2,5-dihydroxyterephthalic acid (2,5-dhtpa) (top) and CPO-27(Ni) (**1**) (bottom).

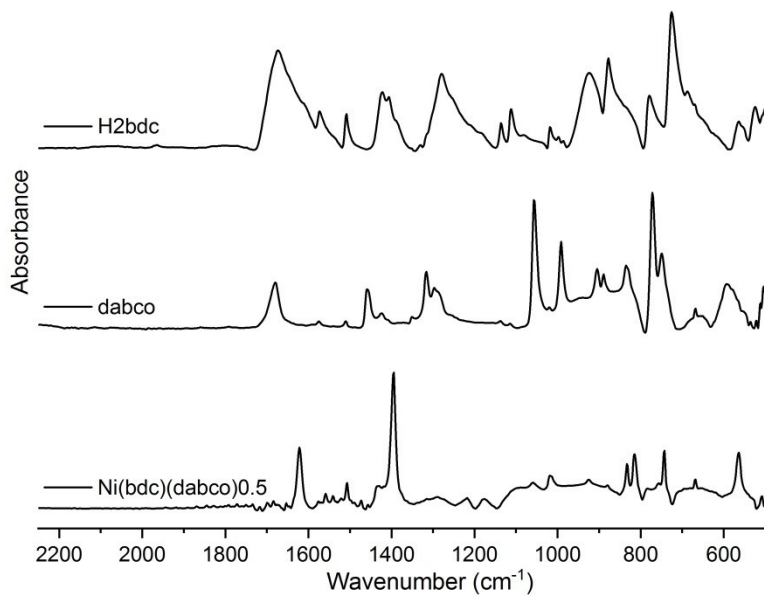

Figure S8. ATR-IR spectra of 1,4-benzenedicarboxylic acid (H<sub>2</sub>bdc) (top) and [Ni(bdc)(dabco)<sub>0.5</sub>]<sub>n</sub> (**4**) (bottom).

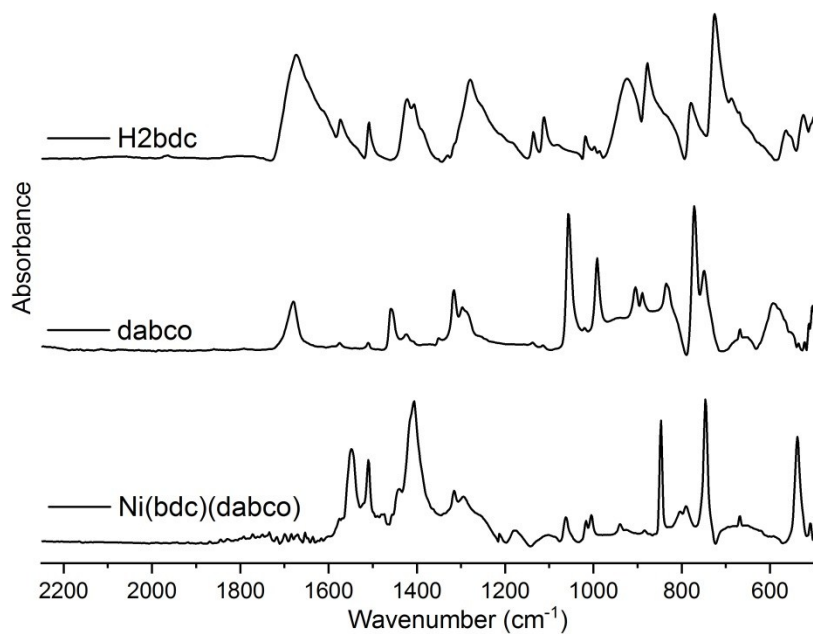

Figure S9. ATR spectra of 1,4-benzenedicarboxylic acid (H<sub>2</sub>bdc) (top), dabco (middle) and [Ni(bdc)(dabco)]<sub>n</sub> (**2**) (bottom).

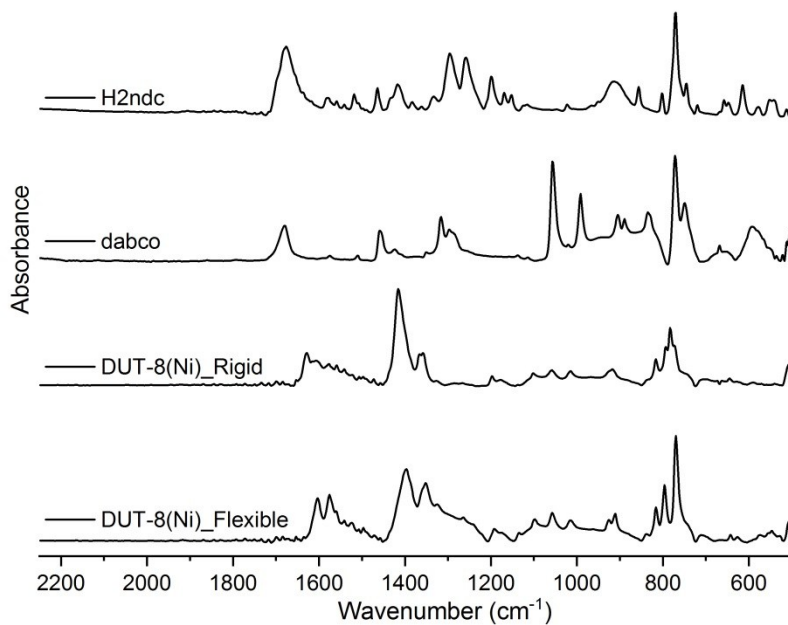

Figure S10. ATR-IR spectra (from top to bottom) of 2,6-naphthalenedicarboxylic acid (H<sub>2</sub>ndc), dabco, [Ni(ndc)(dabco)<sub>0.5</sub>]<sub>n\_rigid</sub> (DUT-8(Ni)\_rigid, **5**) and [Ni(ndc)(dabco)<sub>0.5</sub>]<sub>n\_flexible</sub> (DUT-8(Ni)\_flexible, **6**).



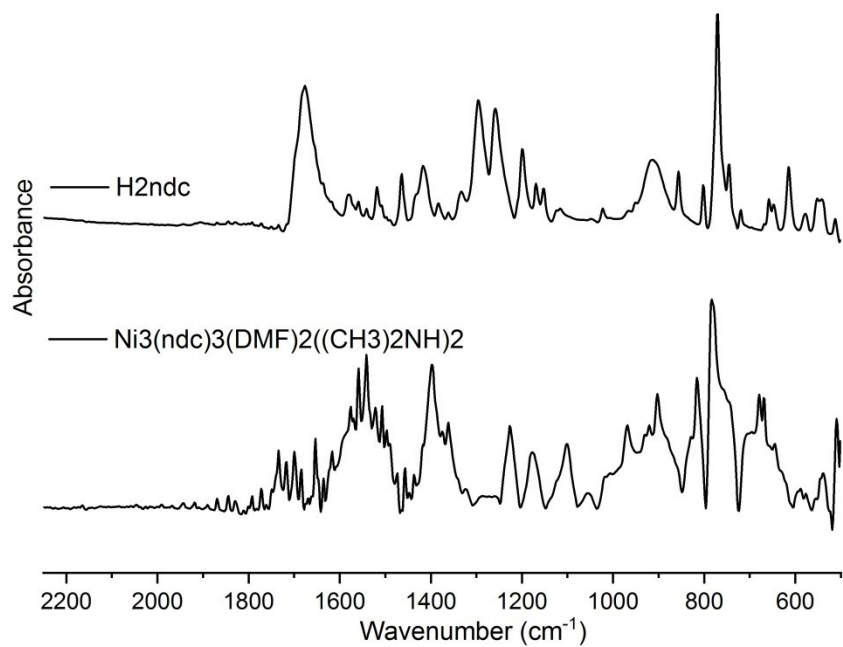

Figure S11. ATR spectra of 2,6-naphtalenedicarboxylic acid (H<sub>2</sub>ndc) (top) and [Ni<sub>3</sub>(ndc)<sub>3</sub>(DMF)<sub>2</sub>((CH<sub>3</sub>)<sub>2</sub>NH)<sub>2</sub>]<sub>n</sub> (**3**) (bottom).

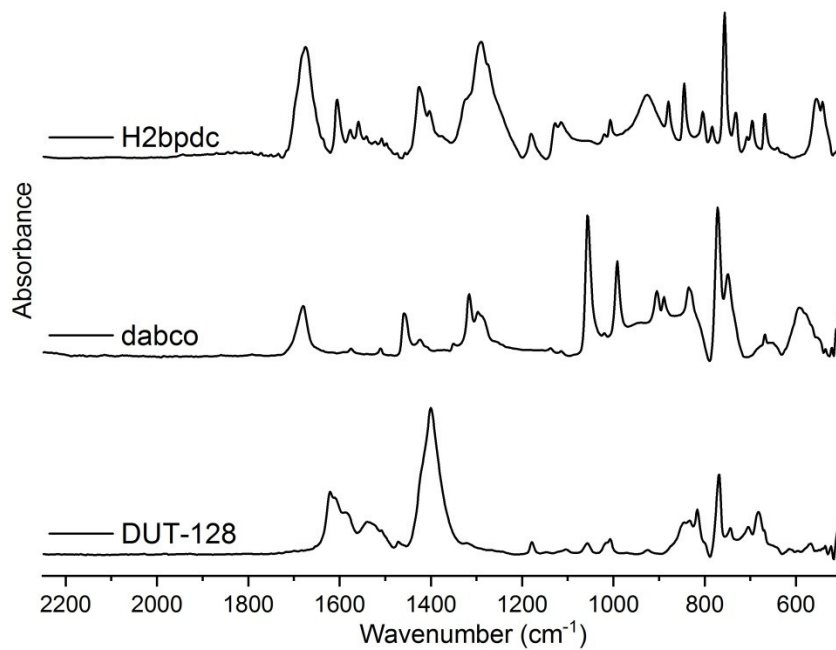

Figure S12. ATR spectra of 4,4'-biphenyldicarboxylic acid (H<sub>2</sub>bpdic) (top), dabco (middle) and DUT-128 (**7**) (bottom).

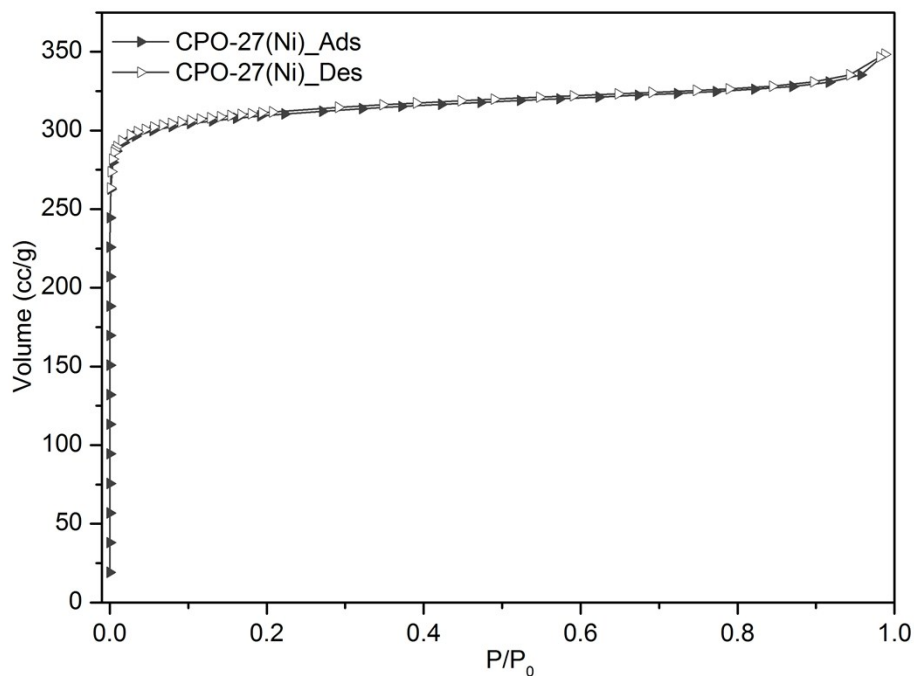

Figure S13. N<sub>2</sub> physisorption isotherm of CPO-27(Ni) (**1**) at 77 K. Solid symbols – adsorption, empty symbols – desorption.

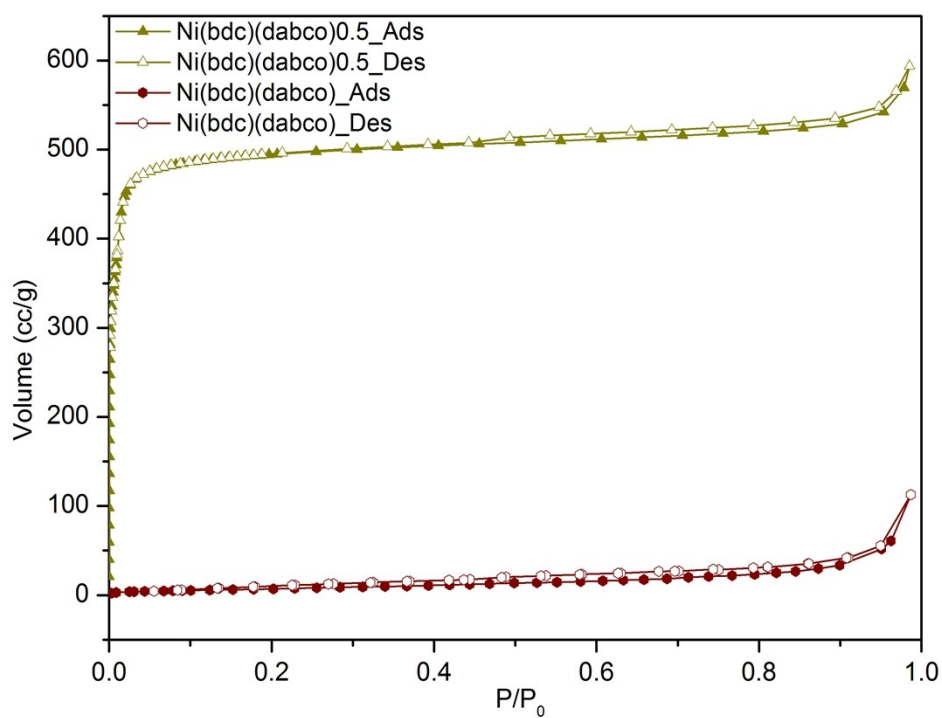

Figure S14. N<sub>2</sub> physisorption isotherms of [Ni(bdc)(dabco)]<sub>n</sub> (**2**) and [Ni(bdc)(dabco)<sub>0.5</sub>]<sub>n</sub> (**4**) at 77 K. Solid symbols – adsorption, empty symbols – desorption.

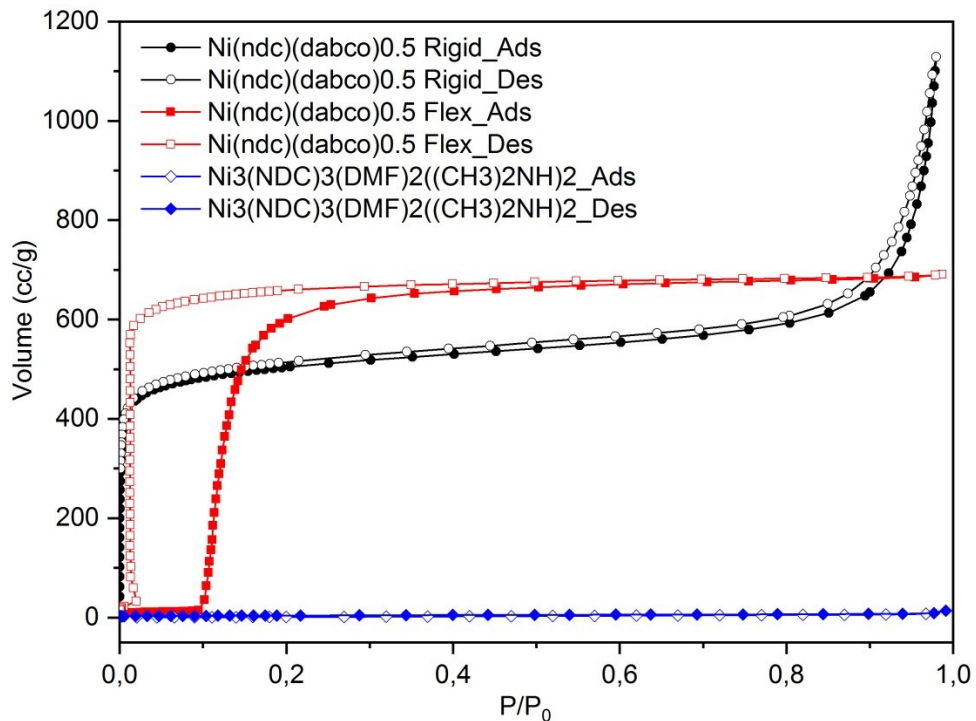

Figure S15. N<sub>2</sub> physisorption isotherms of [Ni<sub>3</sub>(ndc)<sub>3</sub>(DMF)<sub>2</sub>((CH<sub>3</sub>)<sub>2</sub>NH)<sub>2</sub>]<sub>n</sub> (**3**) (blue), DUT-8(Ni)\_rigid (**5**) (black), DUT-8(Ni)\_flexible (**6**) (red), and at 77 K. Solid symbols – adsorption, empty symbols – desorption.

Table S1. Surface area and pore volume of investigated Ni-MOFs.

| Ni-MOFs                                                                                                                              | BET area (m <sup>2</sup> g <sup>-1</sup> ) | Pore volume (cm <sup>3</sup> g <sup>-1</sup> ) |
|--------------------------------------------------------------------------------------------------------------------------------------|--------------------------------------------|------------------------------------------------|
| CPO-27(Ni) ( <b>1</b> )                                                                                                              | 1223                                       | 0.5                                            |
| [Ni(bdc)(dabco)] <sub>n</sub> ( <b>2</b> )                                                                                           | 19                                         | 0.1                                            |
| [Ni <sub>3</sub> (ndc) <sub>3</sub> (DMF) <sub>2</sub> ((CH <sub>3</sub> ) <sub>2</sub> NH) <sub>2</sub> ] <sub>n</sub> ( <b>3</b> ) | 12                                         | 0.02                                           |
| [Ni(bdc)(dabco) <sub>0.5</sub> ] <sub>n</sub> ( <b>4</b> )                                                                           | 1983                                       | 0.9                                            |
| DUT-8(Ni)_rigid ( <b>5</b> )                                                                                                         | 1899                                       | 0.9                                            |
| DUT-8(Ni)_flexible ( <b>6</b> )                                                                                                      | -                                          | 1.0                                            |
| DUT-128 ( <b>7</b> )                                                                                                                 | 850                                        | 0.8                                            |

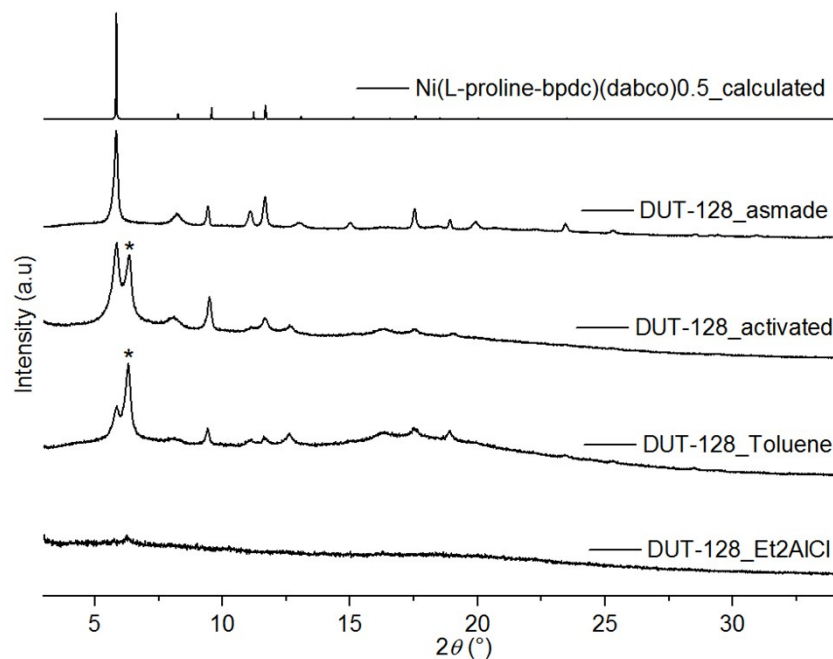

Figure S16. PXRD patterns of DUT-128 (**7**) from top to bottom: theoretical PXRD pattern of  $[\text{Ni}(\text{L-proline-bpdc})(\text{dabco})_{0.5}]_n$  [CCDC 1835717]; DUT-128 as-made; DUT-128 activated; activated DUT-128 immersed in toluene; and DUT-128 after stirring in toluene in the presence of the  $\text{Et}_2\text{AlCl}$  overnight. The new peak (\*) in the PXRD patterns of activated sample and sample after immersion in toluene can be assigned to the closed pore phase as observed for DUT-8(Ni).

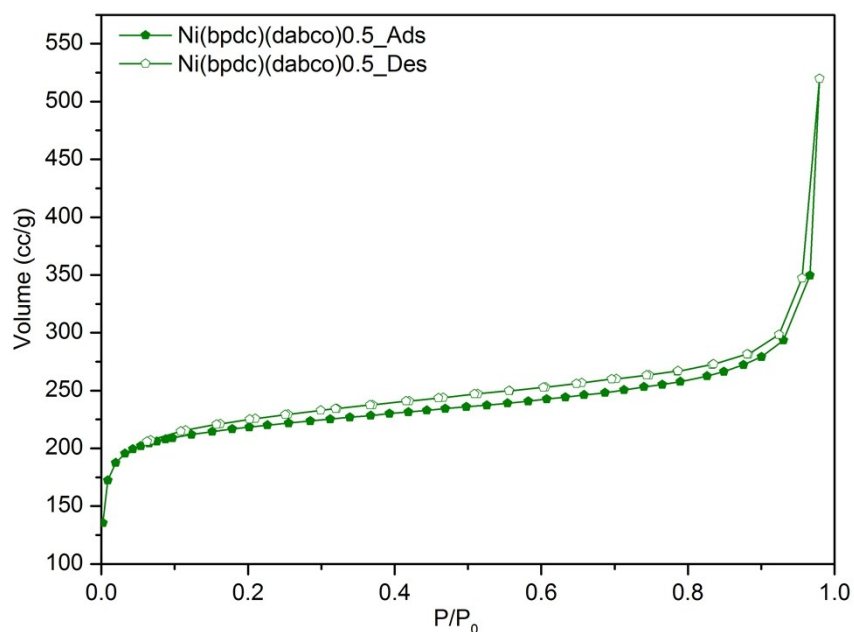

Figure S17.  $\text{N}_2$  physisorption isotherm of DUT-128 (**7**) at 77 K. Solid symbols – adsorption, empty symbols – desorption.

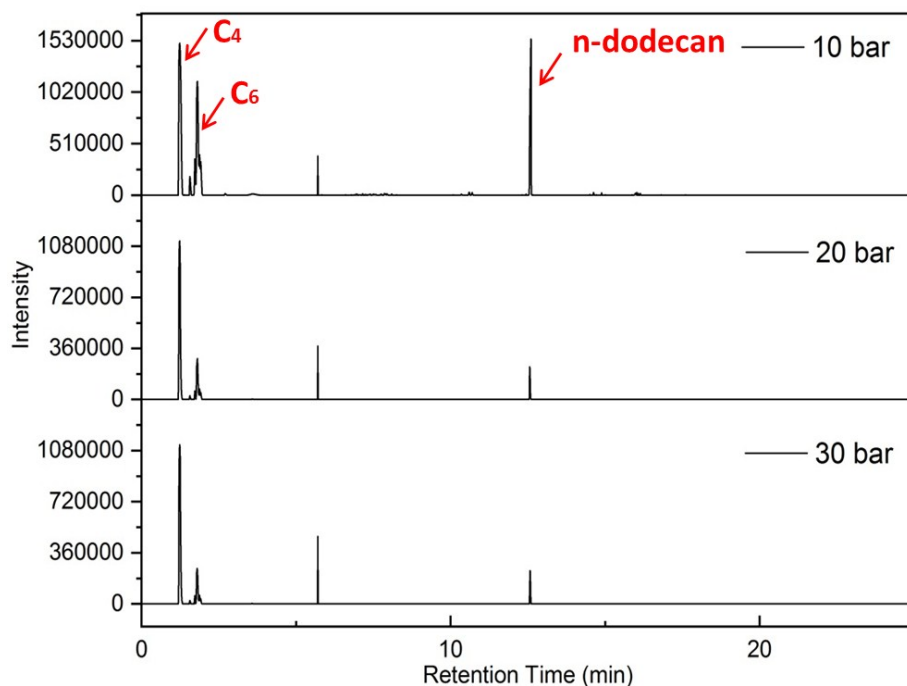

Figure S18. Typical chromatogram of products formed in ethylene oligomerization reaction catalyzed by DUT-8(Ni)<sub>rigid</sub> (**5**) at 10 bar (top), 20 bar (middle), and 30 bar (bottom).

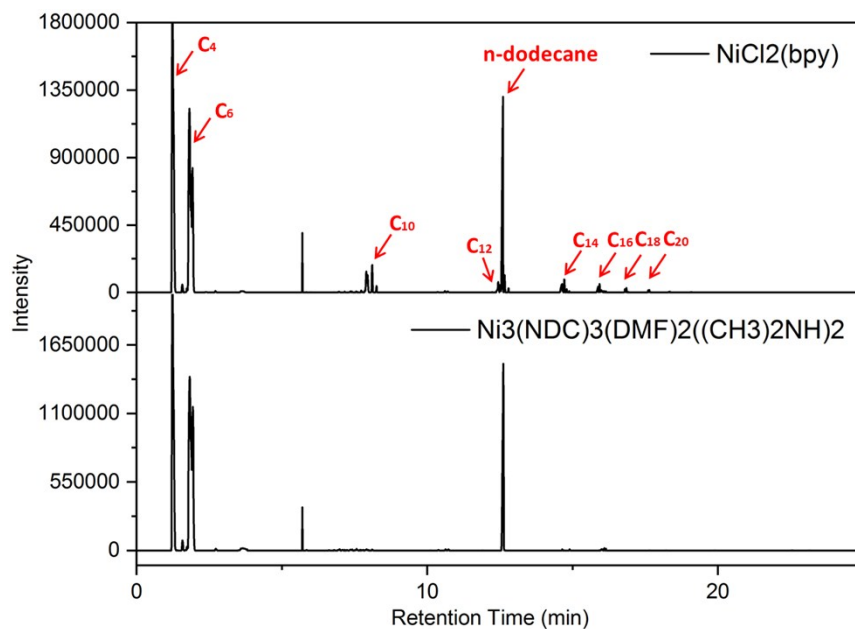

Figure S19. Typical chromatogram of the cyclic reaction products catalyzed by [NiCl<sub>2</sub>(bpy)] (top) and [Ni<sub>3</sub>(ndc)<sub>3</sub>(DMF)<sub>2</sub>((CH<sub>3</sub>)<sub>2</sub>NH)<sub>2</sub>]<sub>n</sub> (**3**) (bottom). C<sub>8</sub> oligomers could not be detected due to the peak overlap with broad signal of the toluene.

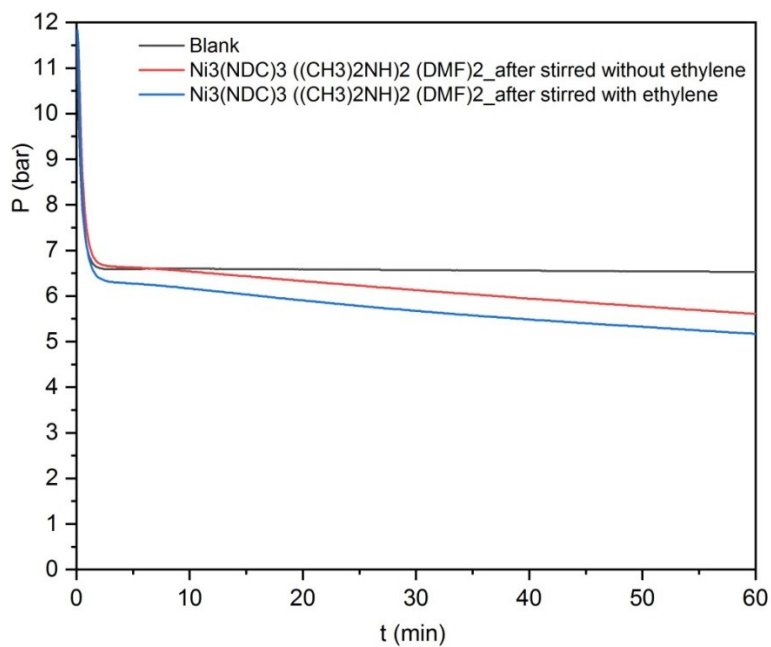

Figure S20. Ethylene consumption in leaching test using  $[\text{Ni}_3(\text{ndc})_3(\text{DMF})_2((\text{CH}_3)_2\text{NH})_2]_n$  (**3**) as catalyst.

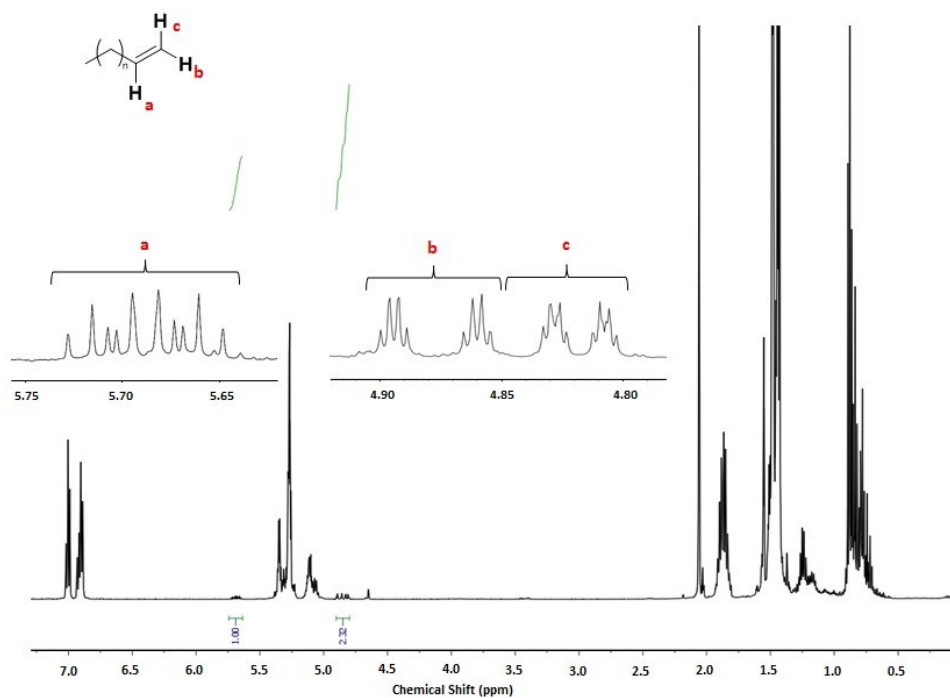

Figure S21. <sup>1</sup>H NMR of ethylene oligomerization products formed in the reaction catalyzed by  $[\text{Ni}_3(\text{ndc})_3(\text{DMF})_2((\text{CH}_3)_2\text{NH})_2]_n$  (**3**) at 1 bar ethylene pressure and 21 °C.
